# Supplementary material for: Detection of DNA translocations in a nanopore series circuit using a current clamp
Source: Royal Society of Chemistry journal article supplement (doi:10.1039/d2cp04530c), 2023-01-01
Supplement: d2cp04530c1.pdf [file d2cp04530c1.pdf]

# Supporting Information for:

## Detect the DNA translocation in a nanopore series circuit using a current clamp

Fei Zheng<sup>1</sup>, Yi Tao<sup>1</sup>, Wei Xu<sup>1</sup>, Jingjie Sha<sup>1\*</sup>

<sup>1</sup>Jiangsu Key Laboratory for Design and Manufacture of Micro-Nano Biomedical Instruments, School of Mechanical Engineering, Southeast University, Nanjing 211189, China

\*Correspondence to: Jingjie Sha, E-mail: [major212@seu.edu.cn](mailto:major212@seu.edu.cn)

### Supplementary Figures

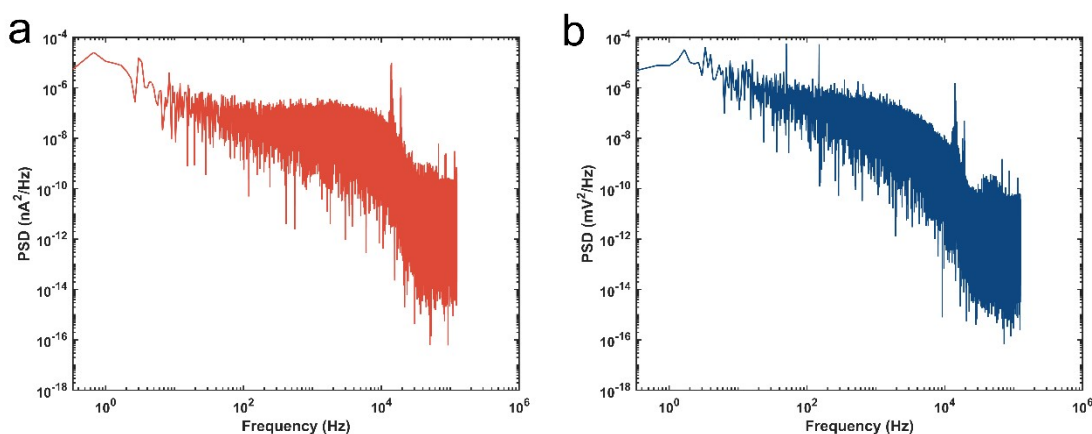

**Figure S1.** Power spectral density (PSD) of the current trace (a) and the voltage trace (b).

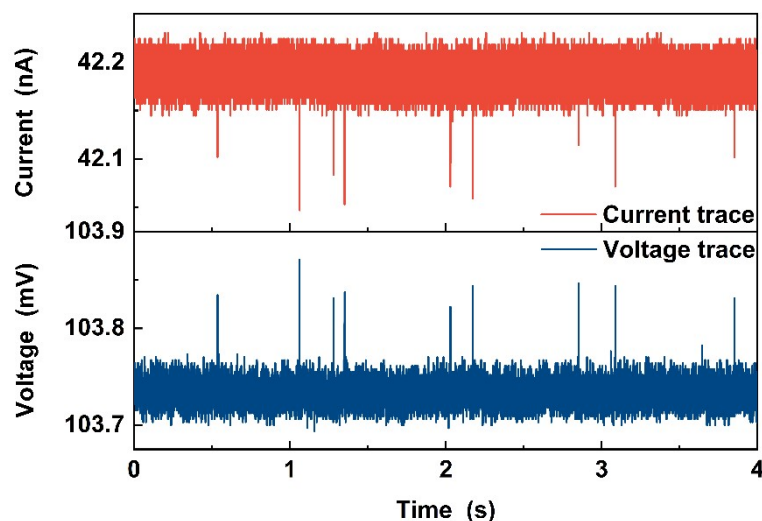

**Figure S2.** A typical current trace and its corresponding voltage trace in a 4 s period selected from the experiment of 200 mV. The DNA translocation will induce a current blockade signal and a voltage blockade signal simultaneously.

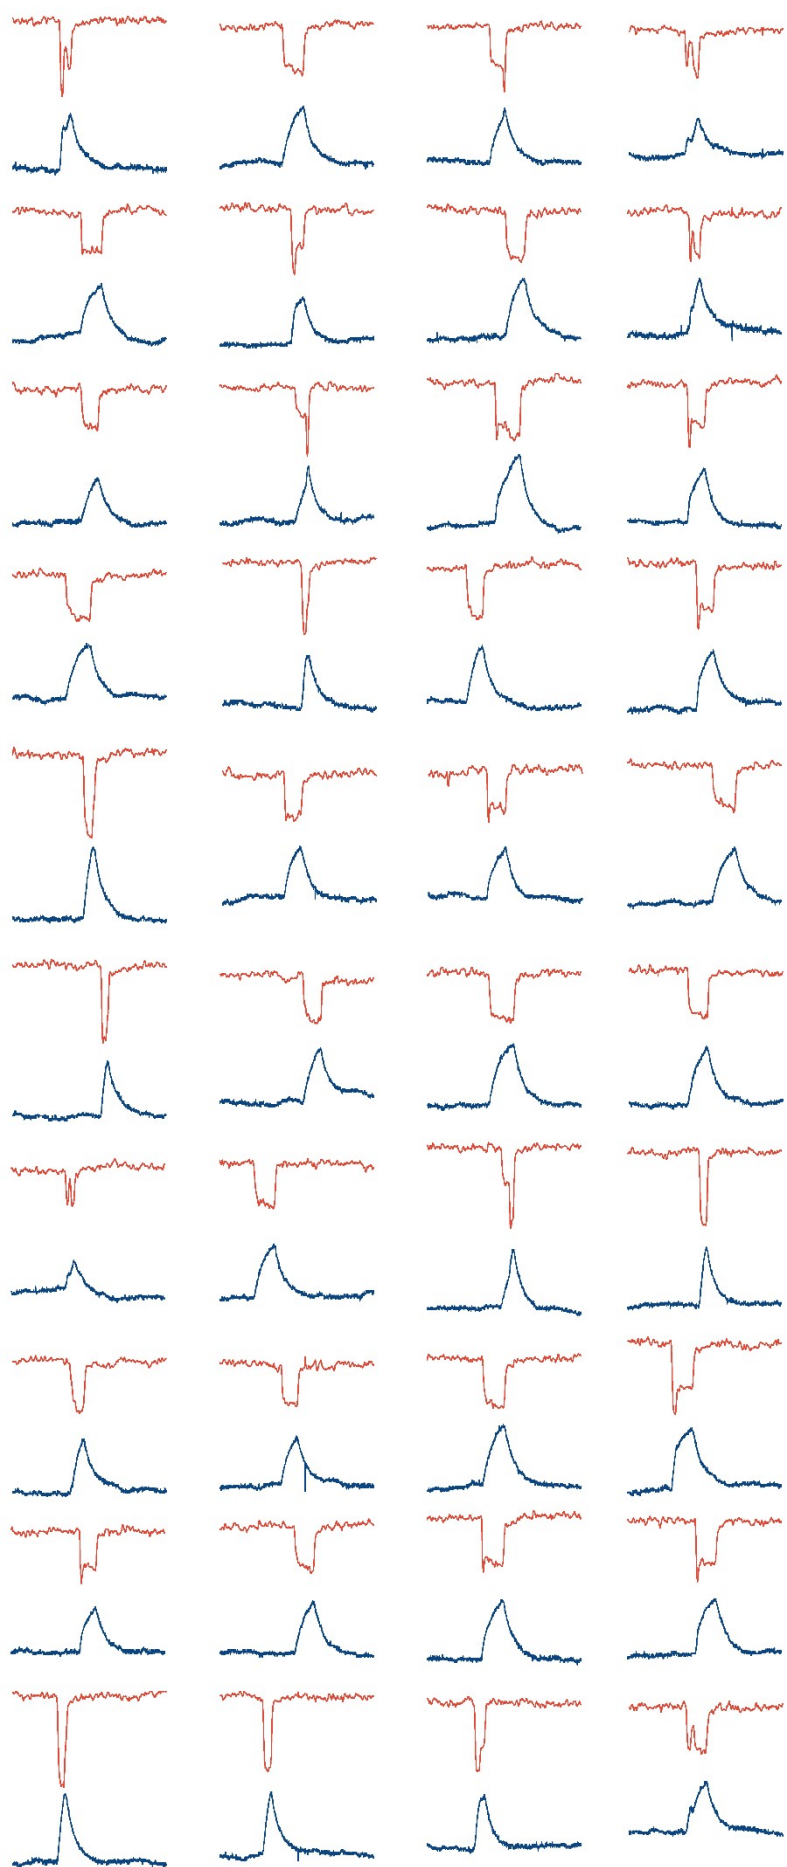

**Figure S3.** Specific current blockade signals and corresponding voltage blockade signals  
(Number=40) selected from a 10 s period of the current/voltage traces.
